# Supplementary material for: Mechanical Properties of Lumbar and Cervical Paravertebral Muscles in Patients with Axial Spondyloarthritis: A Case-Control Study
Source: MDPI journal article supplement (doi:10.3390/diagnostics11091662), 2021-09-10
Supplement: s1 [file diagnostics-1324557-supplementary.pdf › diagnostics-1324557-supplementary.pdf]

**Table S1.** Summary of the Stepwise Regression Analyses to determine Predictors of cervical muscles frequency, stiffness and decrement.

|           | Predictor Outcome                       | B     | SE B | 95% CI       | B     | t      | P     |
|-----------|-----------------------------------------|-------|------|--------------|-------|--------|-------|
| Frequency | Step 1 (adjusted R <sup>2</sup> = .298) |       |      |              |       |        |       |
|           | Age                                     | .074  | .015 | .045, .104   | .556  | 5.100  | <.001 |
|           | Step 2 (adjusted R <sup>2</sup> = .385) |       |      |              |       |        |       |
|           | Age                                     | .102  | .016 | .069, .135   | .764  | 6.212  | <.001 |
|           | Tragus-wall                             | -.102 | .034 | -.170, -.035 | -.373 | -3.030 | .004  |
|           | Step 3 (adjusted R <sup>2</sup> = .422) |       |      |              |       |        |       |
|           | Age                                     | .099  | .016 | .067, .131   | .743  | 6.208  | <.001 |
| Stiffness | Tragus-wall                             | -.136 | .036 | -.209, -.063 | -.497 | -3.753 | <.001 |
|           | Lateral flexion                         | -.040 | .019 | -.077, -.003 | -.254 | -2.159 | .035  |
|           | Step 1 (adjusted R <sup>2</sup> = .264) |       |      |              |       |        |       |
| Stiffness | Age                                     | 2.048 | .435 | 1.176, 2.919 | .525  | 4.703  | <.001 |
|           | Step 2 (adjusted R <sup>2</sup> = .328) |       |      |              |       |        |       |
|           | Age                                     | 2.824 | .514 | 1.794, 3.853 | .725  | 5.491  | <.001 |
| Decrement | Cervical rotation                       | .692  | .270 | .152, 1.233  | .338  | 2.565  | .013  |
|           | Step 1 (adjusted R <sup>2</sup> = .423) |       |      |              |       |        |       |
|           | Age                                     | .015  | .002 | .010, .019   | .658  | 6.646  | <.001 |
|           | Step 2 (adjusted R <sup>2</sup> = .523) |       |      |              |       |        |       |
|           | Age                                     | .017  | .002 | .013, .022   | .783  | 8.131  | <.001 |
|           | BASDAI                                  | .036  | .010 | .056, .016   | .350  | 3.637  | .001  |
|           | Step 3 (adjusted R <sup>2</sup> = .615) |       |      |              |       |        |       |
| Decrement | Age                                     | .013  | .002 | .009, .018   | .595  | 5.970  | <.001 |
|           | BASDAI                                  | .048  | .009 | .067, .029   | .463  | 2.729  | <.001 |
|           | BASMI                                   | .050  | .013 | .024, .076   | .399  | 3.831  | <.001 |

SE: standard error; CI: confidence interval.

**Table S2.** Summary of the Stepwise Regression Analyses to determine Predictors of lumbar muscles frequency, stiffness, decrement, relaxation and creep.

|           | Predictor Outcome                       | B       | SE B   | 95% CI           | B     | t      | P     |
|-----------|-----------------------------------------|---------|--------|------------------|-------|--------|-------|
| Frequency | Step 1 (adjusted R <sup>2</sup> = .504) |         |        |                  |       |        |       |
|           | Intermalleolar distance                 | .064    | .027   | .010, .118       | .244  | 2.367  | .021  |
|           | Step 2 (adjusted R <sup>2</sup> = .578) |         |        |                  |       |        |       |
|           | Intermalleolar distance                 | .092    | .026   | .039, .144       | .351  | 3.504  | .001  |
|           | Schöber test                            | -1.149  | .345   | -1.841, -.457    | -.504 | -3.328 | .002  |
|           | Step 3 (adjusted R <sup>2</sup> = .643) |         |        |                  |       |        |       |
|           | Intermalleolar distance                 | .112    | .025   | .063, .162       | .429  | 4.556  | <.001 |
|           | Schöber test                            | -1.672  | .218   | -2.109, -1.235   | -.734 | -7.666 | <.001 |
|           | Age                                     | .168    | .036   | .008, .031       | .403  | 4.605  | <.001 |
|           | Step 4 (adjusted R <sup>2</sup> = .679) |         |        |                  |       |        |       |
|           | Intermalleolar distance                 | .126    | .024   | .078, .174       | .482  | 5.278  | <.001 |
|           | Schöber test                            | -1.679  | .207   | -2.093, -1.265   | -.736 | -8.123 | <.001 |
|           | Age                                     | .143    | .036   | .071, .214       | .343  | 3.994  | <.001 |
|           | BASDAI                                  | .429    | .158   | .113, -.745      | .221  | 2.719  | .009  |
|           | Step 5 (adjusted R <sup>2</sup> = .697) |         |        |                  |       |        |       |
|           | Intermalleolar distance                 | .127    | .023   | .080, .173       | .485  | 5.460  | <.001 |
|           | Schöber test                            | -1.643  | .202   | -2.047, -1.239   | -.721 | -8.146 | <.001 |
|           | Age                                     | .144    | .035   | .074, .214       | .346  | 4.146  | <.001 |
|           | BASDAI                                  | .439    | .153   | .131, .746       | .226  | 2.857  | .006  |
|           | Evolution time                          | -.088   | .043   | -.175, -.002     | -.148 | -2.049 | .045  |
| Stiffness | Step 1 (adjusted R <sup>2</sup> = .524) |         |        |                  |       |        |       |
|           | Schöber test                            | -29.509 | 11.824 | -53.187, -5.832  | -.380 | -2.496 | .015  |
|           | Step 2 (adjusted R <sup>2</sup> = .557) |         |        |                  |       |        |       |
|           | Schöber test                            | -38.394 | 12.055 | -62.543, -14.245 | -.495 | -3.185 | .002  |
|           | Intermalleolar distance                 | 2.090   | .915   | .257, 3.923      | .235  | 2.284  | .026  |
|           | Step 3 (adjusted R <sup>2</sup> = .604) |         |        |                  |       |        |       |
|           | Schöber test                            | -42.738 | 11.497 | -65.778, -19.698 | -.551 | -3.717 | <.001 |
|           | Intermalleolar distance                 | 2.609   | .885   | .837, 4.382      | .293  | 2.950  | .005  |
|           | Age                                     | 3.986   | 1.434  | 1.113, 6.859     | .281  | 2.780  | .007  |
|           | Step 4 (adjusted R <sup>2</sup> = .630) |         |        |                  |       |        |       |
|           | Schöber test                            | -49.516 | 7.924  | -65.395, -33.637 | -.638 | -6.249 | <.001 |
|           | Intermalleolar distance                 | 3.333   | .893   | 1.543, 5.123     | .374  | 3.732  | <.001 |
|           | Age                                     | 3.785   | 1.336  | 1.108, 6.461     | .267  | 2.834  | .006  |
|           | BASFI                                   | 15.631  | 6.227  | 3.151, 28.111    | .269  | 2.510  | 0.015 |

|            |                                         |        |      |               |       |        |       |
|------------|-----------------------------------------|--------|------|---------------|-------|--------|-------|
| Decrement  | Step 1 (adjusted R <sup>2</sup> = .050) |        |      |               |       |        |       |
|            | Age                                     | .008   | .004 | .000, .015    | .255  | 2.007  | .049  |
|            | Step 2 (adjusted R <sup>2</sup> = .153) |        |      |               |       |        |       |
|            | Age                                     | .012   | .004 | .004, .020    | .412  | 3.124  | .004  |
|            | Schöber test                            | .062   | .022 | .018, .105    | .377  | 2.858  | .006  |
|            | Step 3 (adjusted R <sup>2</sup> = .285) |        |      |               |       |        |       |
|            | Age                                     | .018   | .004 | .010, .025    | .589  | 4.468  | <.001 |
|            | Schöber test                            | .082   | .021 | .040, .123    | .499  | 3.951  | <.001 |
|            | Height                                  | .019   | .006 | .008, .031    | .410  | 3.396  | .001  |
|            | Step 4 (adjusted R <sup>2</sup> = .367) |        |      |               |       |        |       |
|            | Age                                     | .016   | .004 | .009, .024    | .545  | 4.362  | <.001 |
|            | Schöber test                            | .112   | .022 | .068, .156    | .685  | 5.060  | <.001 |
|            | Height                                  | .022   | .005 | .011, .033    | .474  | 4.091  | <.001 |
|            | Intermalleolar distance                 | -.007  | .002 | -.012, -.002  | -.367 | -2.870 | .006  |
|            | Step 5 (adjusted R <sup>2</sup> = .470) |        |      |               |       |        |       |
|            | Age                                     | .023   | .004 | .015, .031    | .770  | 5.831  | <.001 |
|            | Schöber test                            | .099   | .021 | .058, .141    | .606  | 4.814  | <.001 |
|            | Height                                  | .027   | .005 | .017, .038    | .580  | 5.249  | <.001 |
|            | Intermalleolar distance                 | -.010  | .002 | -.015, -.005  | -.523 | -4.163 | <.001 |
|            | Cervical rotation                       | .008   | .002 | .003, .012    | .483  | 3.409  | .001  |
| Relaxation | Step 1 (adjusted R <sup>2</sup> = .367) |        |      |               |       |        |       |
|            | Schöber test                            | 1.313  | .221 | .870, 1.756   | .614  | 5.930  | <.001 |
|            | Step 2 (adjusted R <sup>2</sup> = .403) |        |      |               |       |        |       |
|            | Schöber test                            | 1.008  | .258 | .492, 1.525   | .472  | 3.908  | <.001 |
|            | BASFI                                   | -.413  | .193 | -.800, -.026  | -.258 | -2.135 | .037  |
|            | Step 3 (adjusted R <sup>2</sup> = .534) |        |      |               |       |        |       |
| Creep      | Schöber test                            | 1.163  | .245 | .672, 1.654   | .544  | 4.745  | <.001 |
|            | BASFI                                   | -1.092 | .248 | -1.590, -.594 | -.682 | -4.398 | <.001 |
|            | Intermalleolar distance                 | -.069  | .028 | -.126, -.013  | -.283 | -2.473 | .017  |
|            | Step 1 (adjusted R <sup>2</sup> = .355) |        |      |               |       |        |       |
|            | Schöber test                            | .070   | .012 | .046, .094    | .605  | 5.781  | <.001 |
|            | Step 2 (adjusted R <sup>2</sup> = .398) |        |      |               |       |        |       |
|            | Schöber test                            | .052   | .014 | .024, .080    | .452  | 3.726  | <.001 |
|            | BASFI                                   | -.024  | .011 | -.045, -.003  | -.277 | -2.283 | .026  |
|            | Step 3 (adjusted R <sup>2</sup> = .497) |        |      |               |       |        |       |
|            | Schöber test                            | .068   | .014 | .041, .096    | .591  | 5.017  | <.001 |
|            | BASFI                                   | -.036  | .010 | -.057, -.016  | -.418 | -3.544 | .001  |
|            | Intermalleolar distance                 | -.005  | .002 | -.009, .002   | -.406 | -3.492 | .001  |

SE: standard error; CI: confidence interval.
